# Supplementary material
Source: PubMed Central journal article supplement (PMC3093554)
Supplement: mmc1.pdf [file mmc1.pdf]

# Structural Formation of Huntingtin Exon 1 Aggregates Probed by Small-Angle Neutron Scattering

Christopher B. Stanley,<sup>†</sup> Tatiana Perevozchikova,<sup>‡</sup> and Valerie Berthelier<sup>‡</sup>

<sup>†</sup>Neutron Scattering Science Division, Oak Ridge National Laboratory, P.O. Box 2008, Oak Ridge, TN 37831

<sup>‡</sup>Graduate School of Medicine, University of Tennessee Health Science Center, 1924 Alcoa Highway, Knoxville, TN 37920

## Supporting Material

To calculate the cross-sectional radius of gyration for the three hollow cylinder models representing 1, 2, and 3 filaments of the Perutz  $\beta$ -helix model in Fig. 4D, we derived Eqs. 7a, 7b, and 7c from the mass moment of inertia and parallel axis theorem.

### I. Derivation of Eq. 7a

For the single hollow cylinder cross-section shown in Fig. 4D.1 with inner radius,  $R_i$ , and outer radius,  $R_o$ , the mass per length

$$m = \pi\rho(R_o^2 - R_i^2)$$

where  $\rho$  = density. The mass moment of inertia of this single hollow cylinder cross-section

$$\begin{aligned} I &= \int_0^{2\pi} \int_{R_i}^{R_o} \rho r r^2 dr d\theta \\ &= 2\pi\rho \int_{R_i}^{R_o} r^3 dr \\ &= \frac{1}{2} \pi\rho(R_o^4 - R_i^4) \\ &= \frac{1}{2} \pi\rho(R_o^2 - R_i^2)(R_o^2 + R_i^2) \\ &= \frac{1}{2} m(R_o^2 + R_i^2) \end{aligned}$$

The cross-sectional radius of gyration

$$R_c = \sqrt{\frac{I}{m}}$$

yielding the single hollow cylinder cross-sectional radius of gyration

$$R_{c,f1} = \left( \frac{R_i^2 + R_o^2}{2} \right)^{1/2}$$

## II. Derivation of Eq. 7b

Using the parallel axis theorem

$$I = I_i + md^2$$

where  $I_i$  = mass moment of inertia from the origin and  $d$  = displacement from the origin, the two and three hollow cylinder cases were derived. As shown in Fig. 4D.2 for the cross-section of two adjacent hollow cylinders each with  $d = R_o$  from the axis of rotation

$$\begin{aligned} R_{c,f2} &= \left( \frac{2(I_i + md^2)}{m} \right)^{1/2} \\ &= \left( \frac{2 \left( \frac{1}{2} m(R_o^2 + R_i^2) + mR_o^2 \right)}{m} \right)^{1/2} \\ &= (R_i^2 + 3R_o^2)^{1/2} \end{aligned}$$

## III. Derivation of Eq. 7c

As shown in Fig. 4D.3 for the cross-section of three hollow cylinders each with  $d = (\sqrt{3}/2)R_o$  from the axis of rotation

$$\begin{aligned} R_{c,f3} &= \left( \frac{3(I_i + md^2)}{m} \right)^{1/2} \\ &= \left( \frac{3 \left( \frac{1}{2} m(R_o^2 + R_i^2) + m \left( \frac{\sqrt{3}}{2} R_o \right)^2 \right)}{m} \right)^{1/2} \\ &= \left( \frac{3}{2} R_i^2 + \frac{15}{4} R_o^2 \right)^{1/2} \end{aligned}$$
